# Supplementary material for: Comparative Evaluation of Novel 177Lu-Labeled PNA Probes for Affibody-Mediated PNA-Based Pretargeting
Source: Cancers (Basel). 2021 Jan 28;13(3):500. doi: 10.3390/cancers13030500 (PMC7865858; doi:10.3390/cancers13030500)
Supplement: Supplementary file 1 [file cancers-13-00500-s001.pdf]

# Comparative Evaluation of Novel [ $^{177}\text{Lu}$ ]Lu-labeled PNA Probes for Affibody-Mediated PNA-based Pretargeting

Hanna Tano, Maryam Oroujeni, Anzhelika Vorobyeva, Kristina Westerlund, Yongsheng Liu, Tianqi Xu, Daniel Vasconcelos, Anna Orlova, Amelie Eriksson Karlström and Vladimir Tolmachev

## Supplementary Information

### Production and purification of PNA-based pretargeting agents

Purity of secondary PNA probes were estimated to >90% according to RP-HPLC (Figure S1) and MALDI-TOF/TOF (Figures S2–S4).

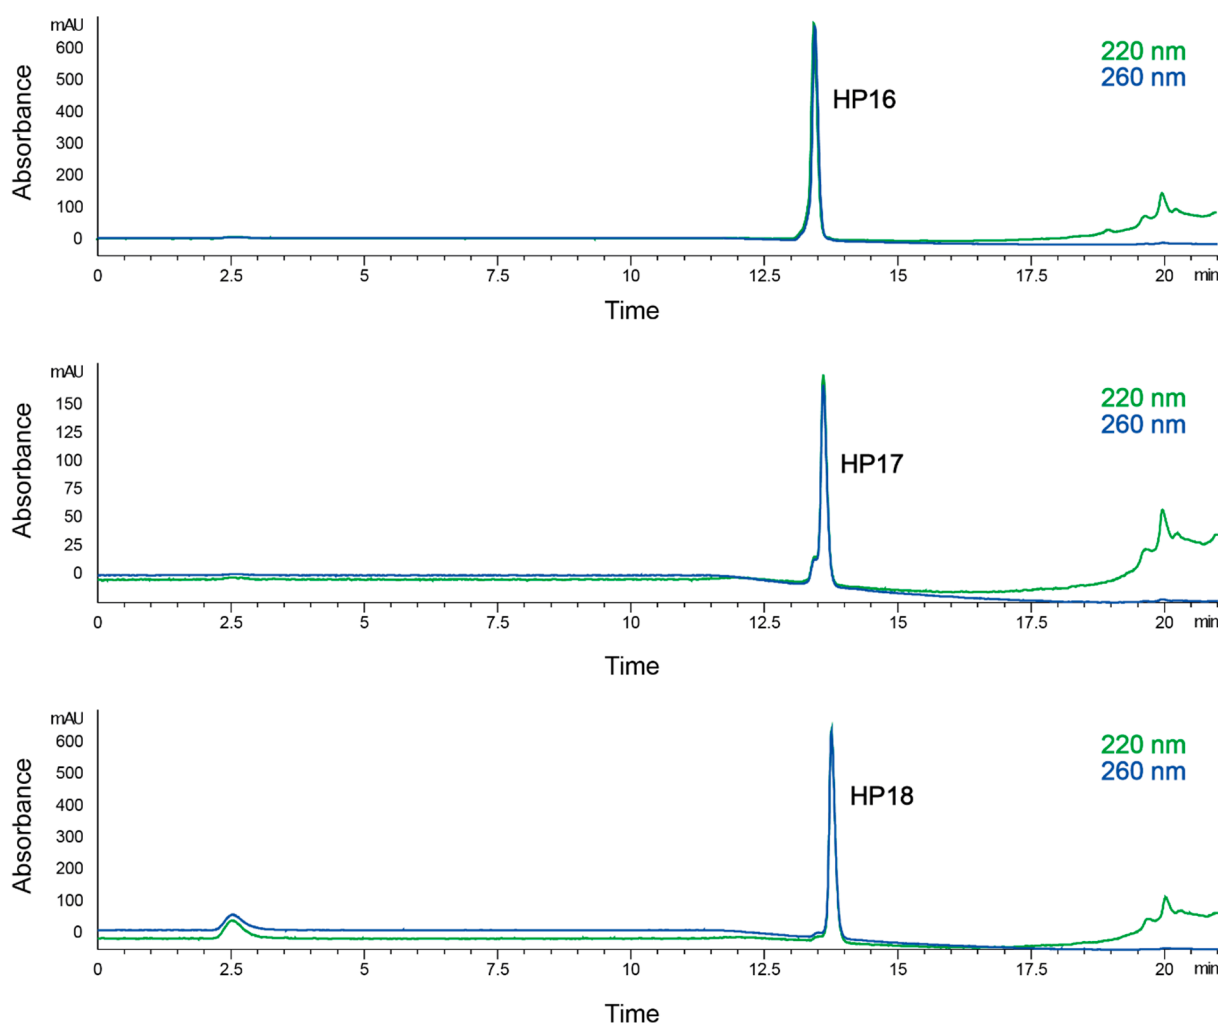

**Figure S1.** Analytical RP-HPLC chromatograms of the purified PNA probes *HP16*, *HP17* and *HP18* monitored at 220 nm (green line) and 260 nm (blue line). Peaks at 220 nm after 20 min (at 100% B: 0.1% TFA in  $\text{CH}_3\text{CN}$ ) were found also in blank injections.

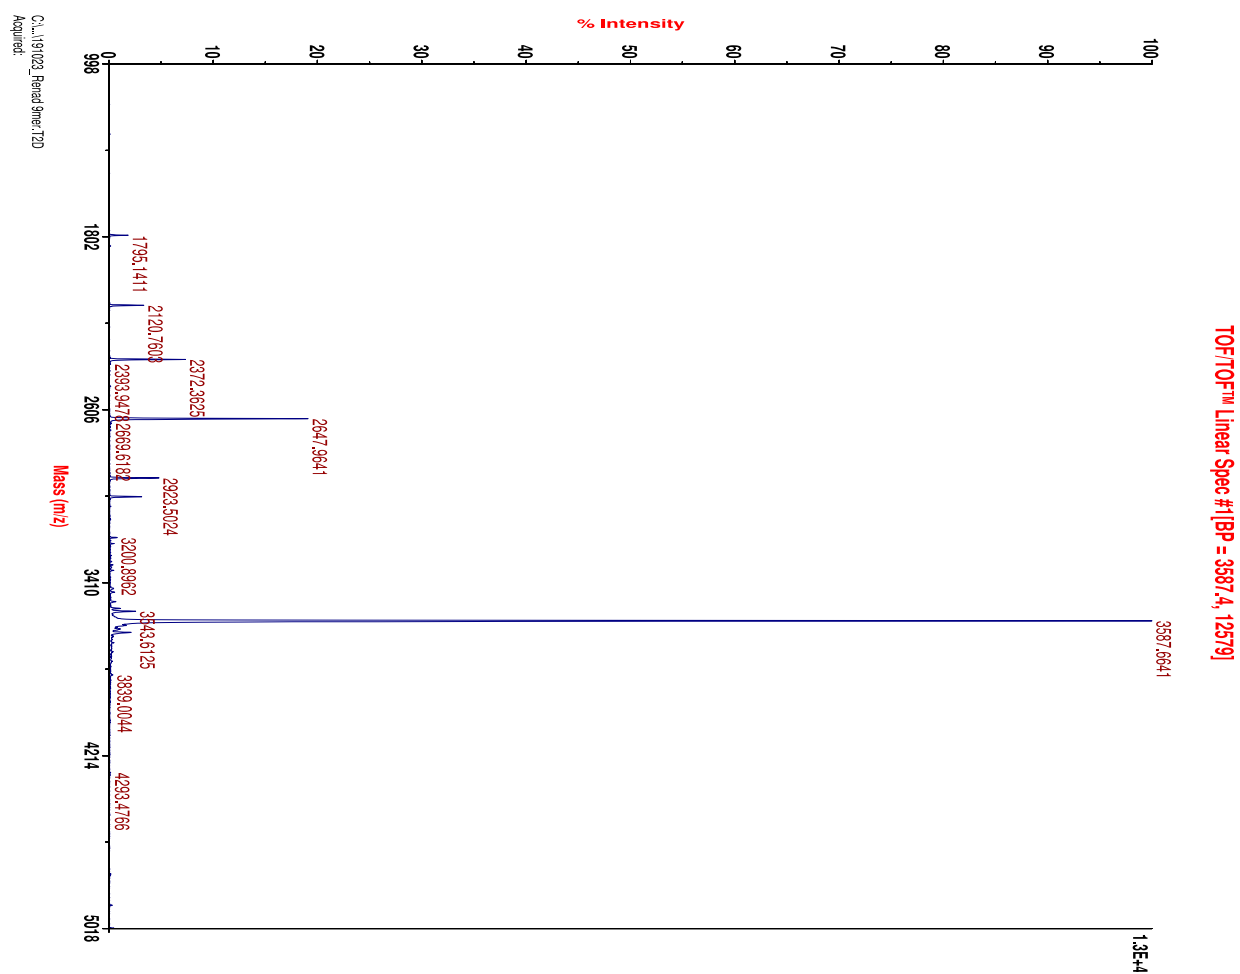

**Figure S2.** MALDI-TOF spectra of purified PNA probe *HP16*. Observed molecular weight is 3588 Da, theoretical molecular weight is 3582 Da.

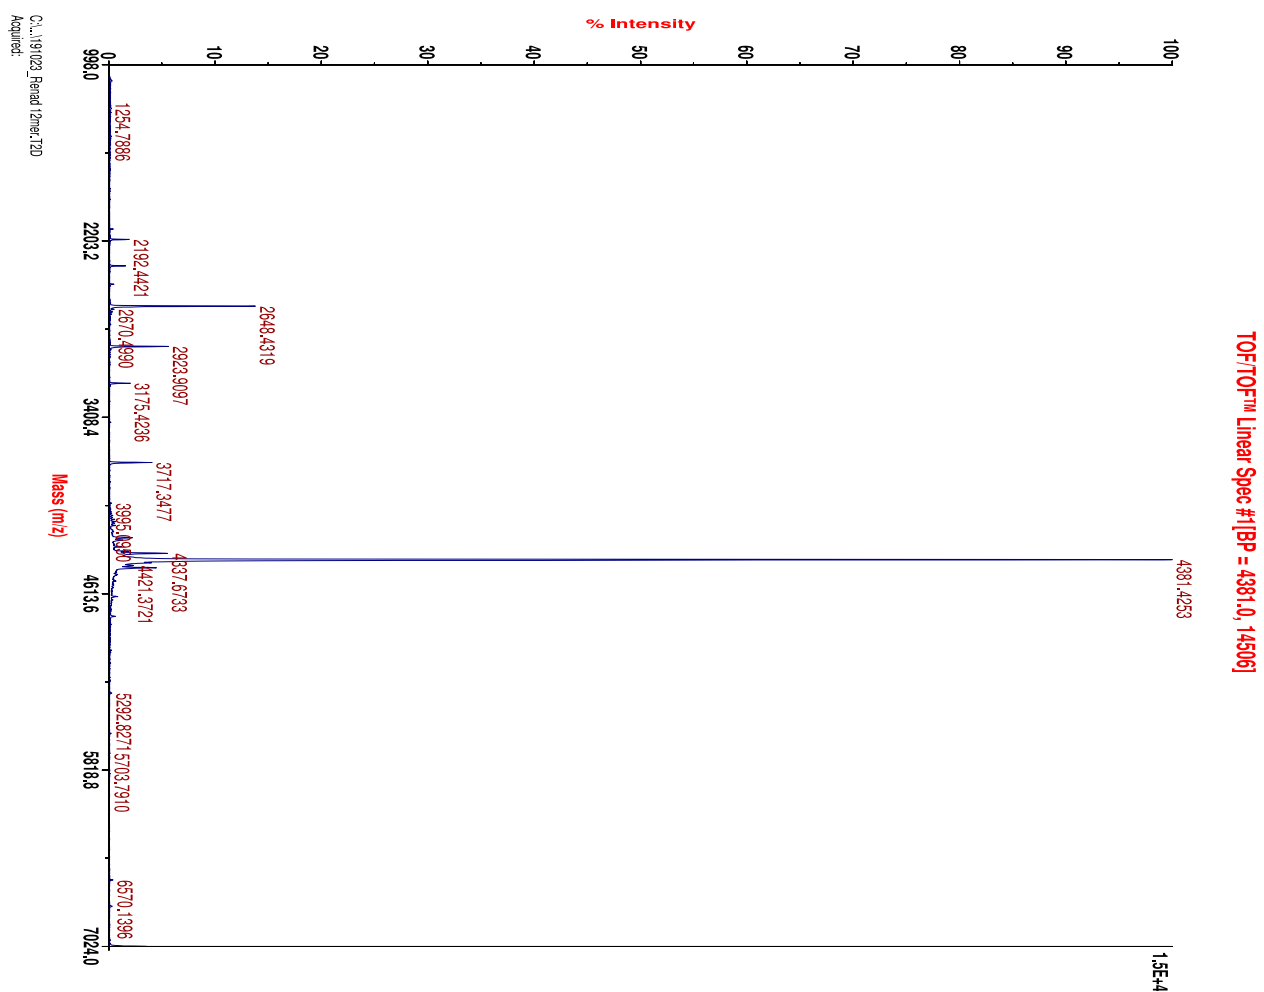

**Figure S3.** MALDI-TOF spectra of purified PNA probe *HP17*. Observed molecular weight is 4381 Da, theoretical weight is 4375 Da.

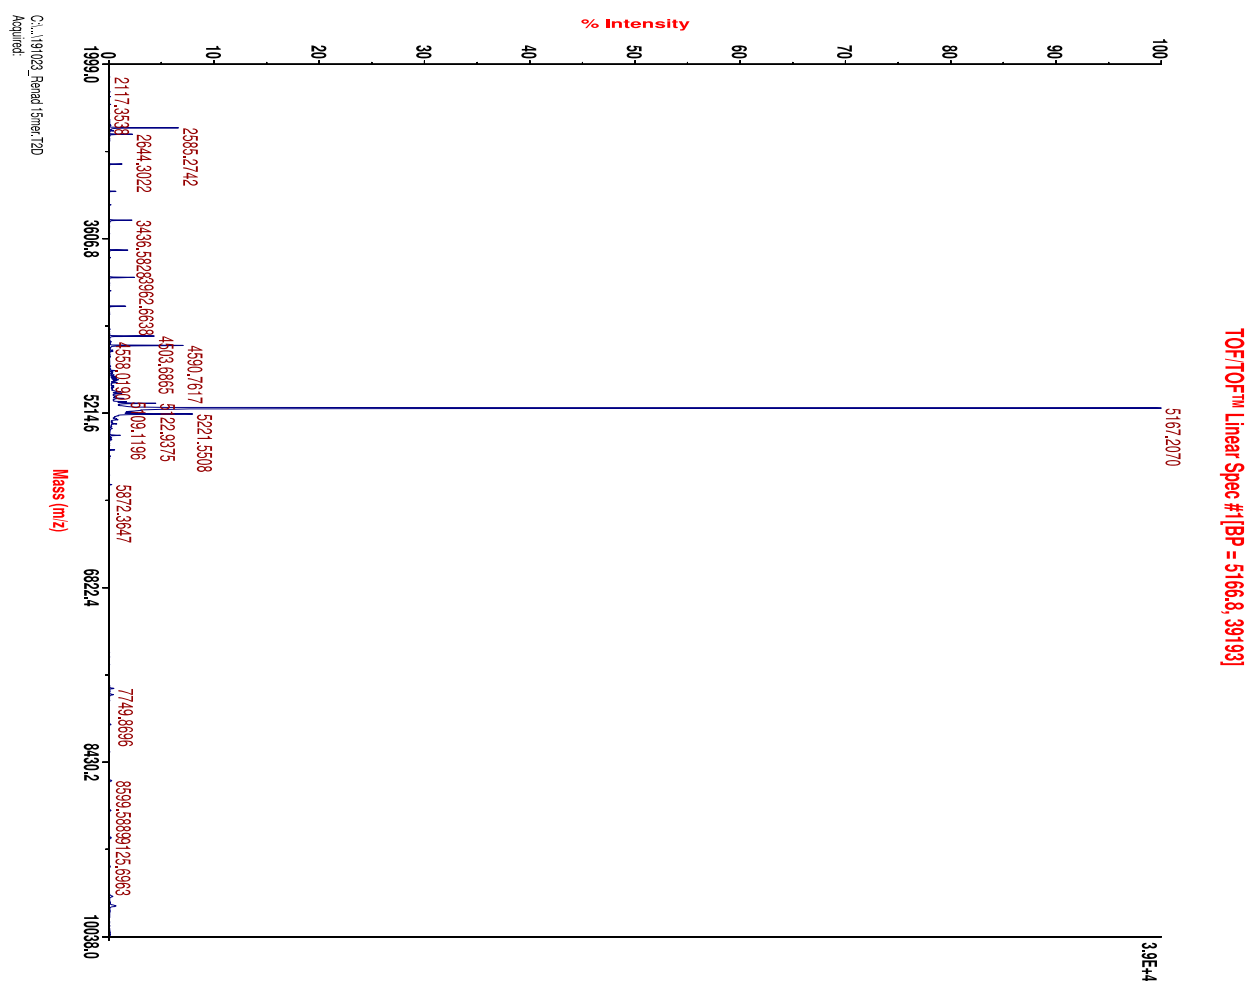

**Figure S4.** MALDI-TOF spectra of purified PNA probe *HP18*. Observed molecular weight is 5167 Da, theoretical molecular weight is 5167 Da.

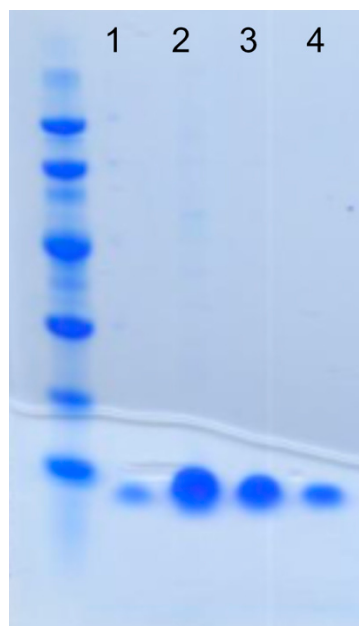

**Figure S5.** SDS-PAGE gel of 4 purified samples (lanes 1-4) of Z<sub>HER2:342</sub>-SR-H<sub>6</sub> (10  $\mu$ l loaded of each sample, with protein concentrations ranging from ca. 0.1  $\mu$ g/ $\mu$ l to ca. 1  $\mu$ g/ $\mu$ l). Ladder: 14.4, 20.1, 30, 45, 66 and 97 kDa (5  $\mu$ l loaded of Amersham Low Molecular Weight Calibration for SDS Electrophoresis, GE Healthcare).

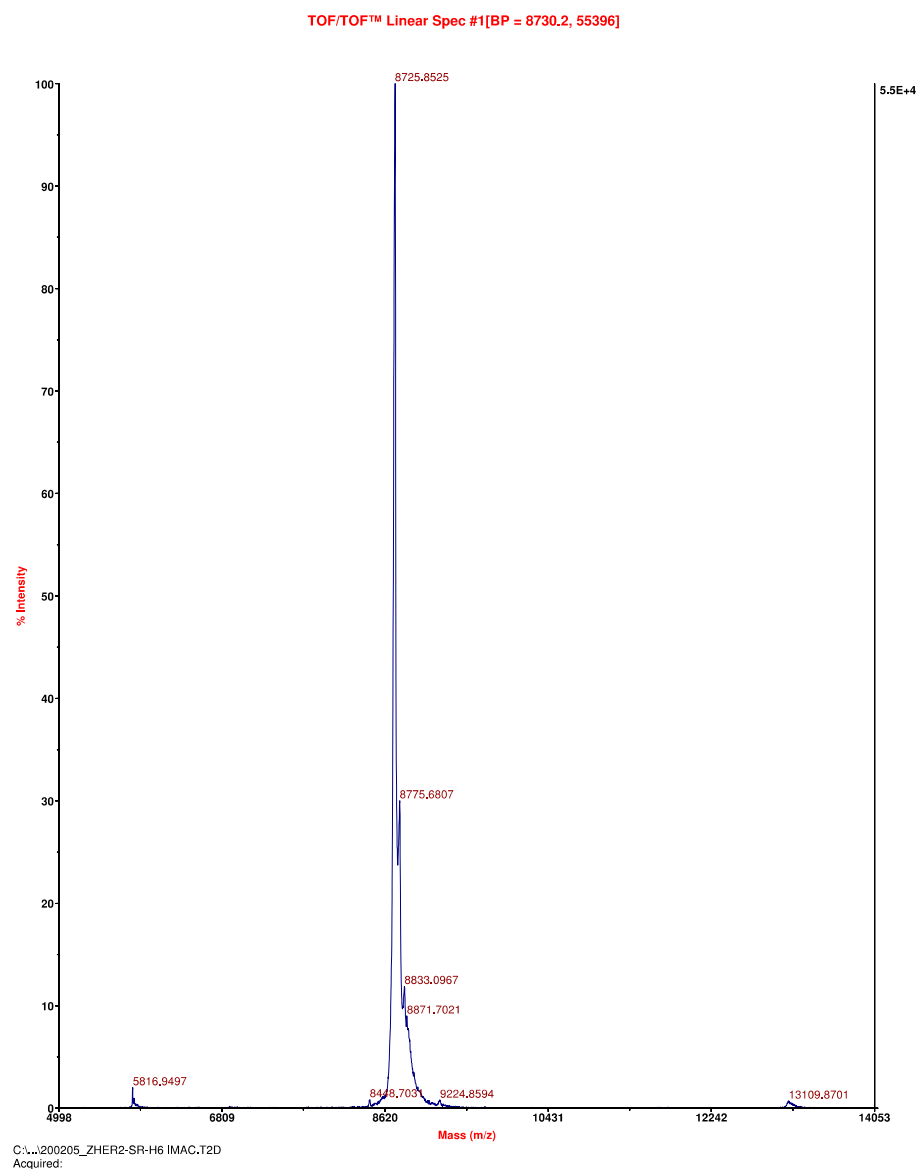

**Figure S6.** MALDI-TOF spectra of purified ZHER2:342-SR-H6. Observed molecular weight is 8726 Da, theoretical molecular weight is 8730 Da.

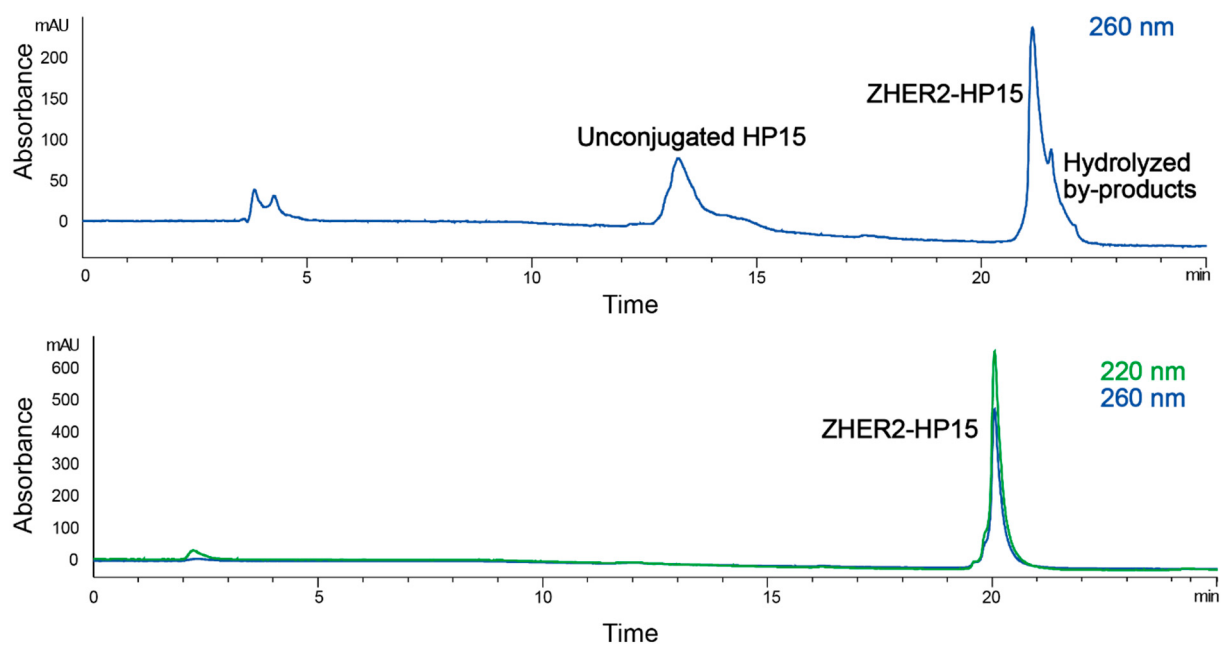

**Figure S7.** RP-HPLC chromatograms monitored at 220 nm (green line) and 260 nm (blue line). Top: Sortase A conjugation reaction of Z<sub>HER2:342</sub>-SR-H<sub>6</sub> and HP15. This representative chromatogram was used to estimate the conjugation efficiency (~40%). Bottom: purified Z<sub>HER2:342</sub>-SR-HP15.

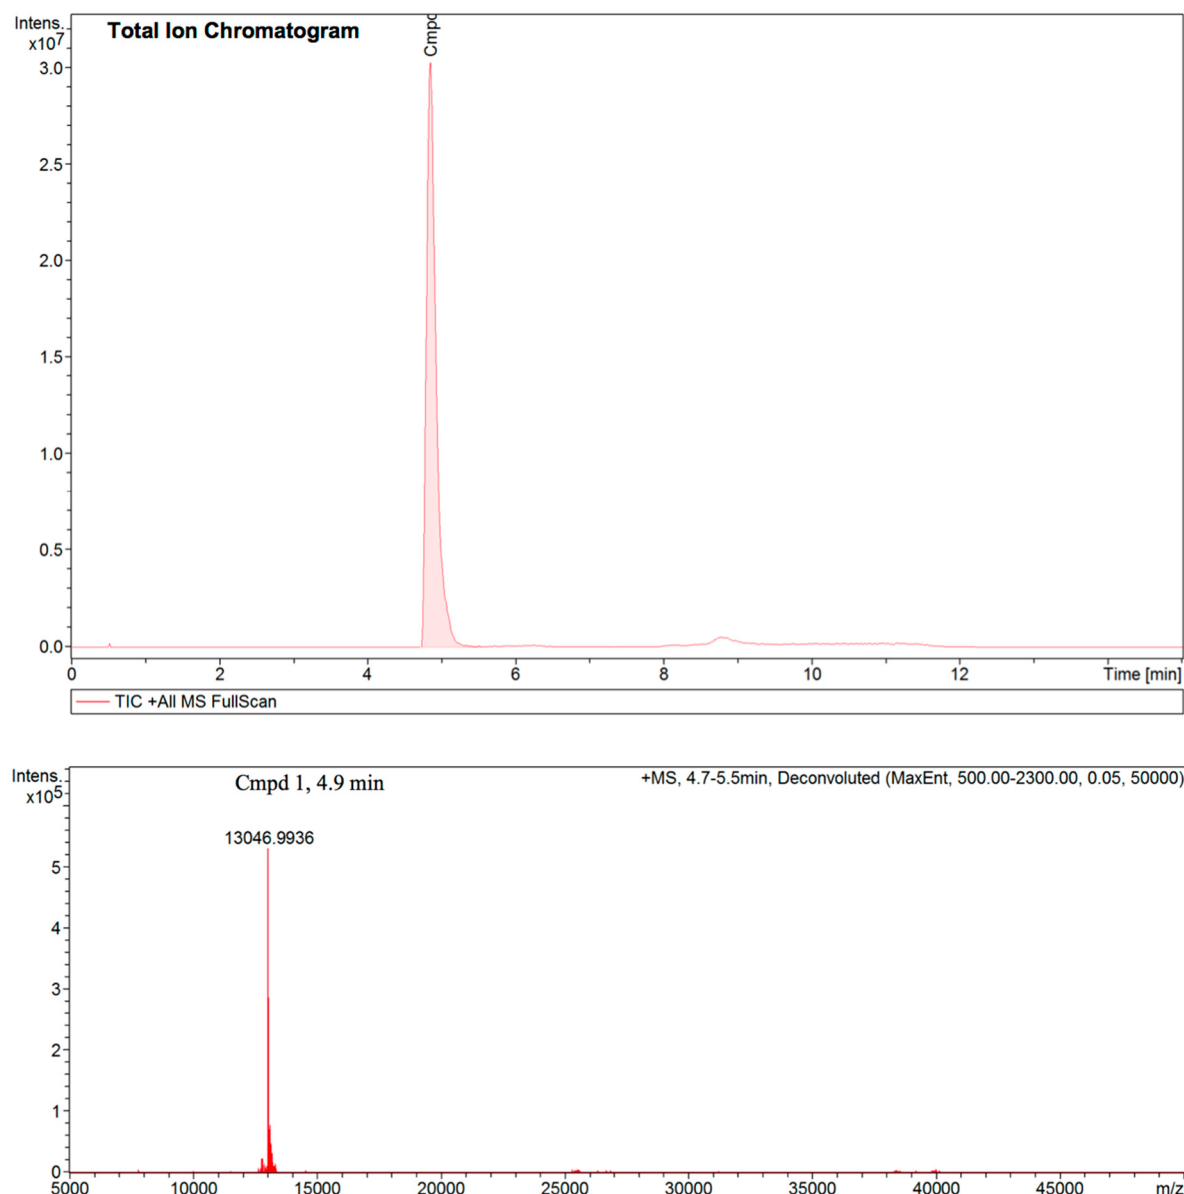

**Figure S8.** LC-MS analysis of purified Z<sub>HER2:342</sub>-SR-HP15. The purity is estimated to >95% and the observed molecular weight is 13047 Da.

### Characterization of the affibody-PNA conjugate and the complementary PNA probes

In order to verify simultaneous binding of Z<sub>HER2:342</sub>-SR-HP15 to HP18 and the HER2 receptor, HER2-Fc (Sino Biological) was immobilized to a dextran chip Series S Sensor CM5 at 757 RU. PNA probe HP18 and Z<sub>HER2:342</sub>-SR-HP15 were mixed at a 1:1 concentration ratio to allow for hybridization prior to injection to HER2-Fc. Pre-hybridized Z<sub>HER2:342</sub>-SR-HP15:HP18 were injected at 6 concentrations; 0.78, 1.56, 3.13, 6.25, 12.5 and 25 nM (Figure S9). Association was allowed for 300 s and dissociation was allowed for 2400 s (40 min), followed by regeneration by injection of 20 mM HCl for 20 s. For the highest injected concentration (25 nM), a dissociation time of 7200 s (2 h) was used. All runs were performed in PBST (0.05 % Tween-20) pH 7.4 using a flow rate of 50 µl/min at 25 °C. After regeneration with HCl, running buffer was passed over the sensor surface for 2 h before injection of the next sample.

The equilibrium dissociation constant ( $K_D$ ) for  $Z_{HER2:342}\text{-SR-HP15:HP18}$  binding to HER2-Fc was calculated to 276 pM, with an association rate constant ( $k_a$ ) of  $2.5 \times 10^6 \text{ M}^{-1}\text{s}^{-1}$  and a dissociation rate constant ( $k_d$ ) of  $7.0 \times 10^{-4} \text{ s}^{-1}$ . This compares well with previously reported kinetic constants for  $Z_{HER2:342}\text{-SR-HP1:HP2}$  binding to HER2, where  $K_D$  was estimated to 212 pM, with the association rate constant  $k_a = 1.4 \times 10^6 \text{ M}^{-1}\text{s}^{-1}$  and the dissociation rate constant  $k_d = 2.9 \times 10^{-4} \text{ s}^{-1}$ .<sup>1</sup> The  $K_D$  for the PNA-conjugated affibodies is approximately 10-fold higher than the  $K_D$  for unmodified  $Z_{HER2:342}$ , which has been reported to be 22 pM.<sup>2</sup> This supports the idea that PNA conjugation only marginally interferes with  $Z_{HER2:342}$  binding to HER2.

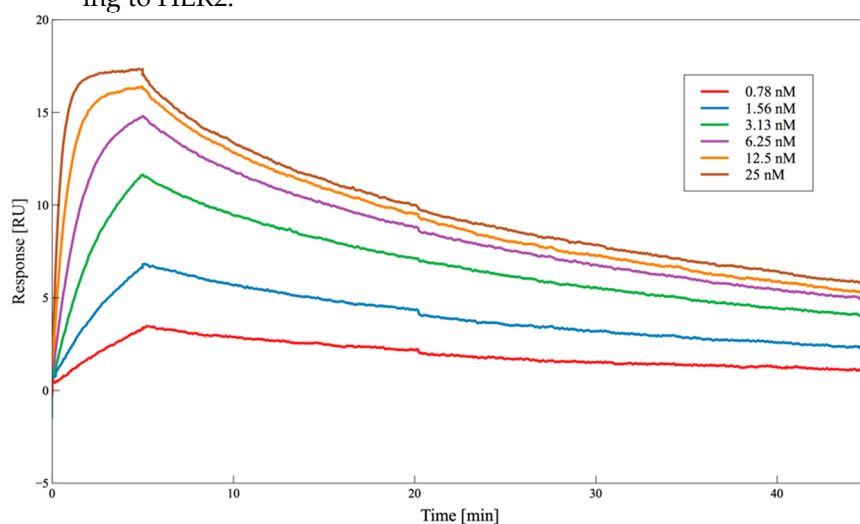

**Figure S9.** SPR sensorgram of  $Z_{HER2:342}\text{-SR-HP15:HP18}$  binding to immobilized HER2-Fc. Pre-hybridized  $Z_{HER2:342}\text{-SR-HP15:HP18}$  was injected at concentrations 0.78, 1.56, 3.13, 6.25, 12.5 and 25 nM.

CD spectroscopy (Chirascan, Applied Photophysics) was used to investigate the secondary structure of the PNA:PNA hybridization complexes. CD signal was recorded at wavelengths ranging from 195 to 300 nm. All CD spectra were recorded at a protein/PNA concentration of 0.15–0.2 mg/ml in 20 mM potassium phosphate buffer with 100 mM KCl at pH 7.4.

The hybridization between *HP15* and the secondary probes *H16*, *HP17* or *HP18* gave rise to CD spectra with minima at approximately 215 nm and 260 nm (Figure S10). The induced signals are the result of PNA:PNA double helix formation upon hybridization between complementary PNA probes carrying C-terminal L-amino acids.

<sup>1</sup> Design, Preparation, and Characterization of PNA-Based Hybridization Probes for Affibody-Molecule-Mediated Pretargeting , Kristina Westerlund, Hadis Honarvar, Vladimir Tolmachev, and Amelie Eriksson Karlström

<sup>2</sup> Orlova, A., Magnusson, M., Eriksson, T. L., Nilsson, M., Larsson, B., Höideń Guthenberg, I., Widström, C., Carlsson, J., Tolmachev, V., Ståhl, S., and Nilsson, F. Y. (2006) *Tumor imaging using a picomolar affinity HER2 binding affibody molecule*. Cancer Res. 66, 4339–4348

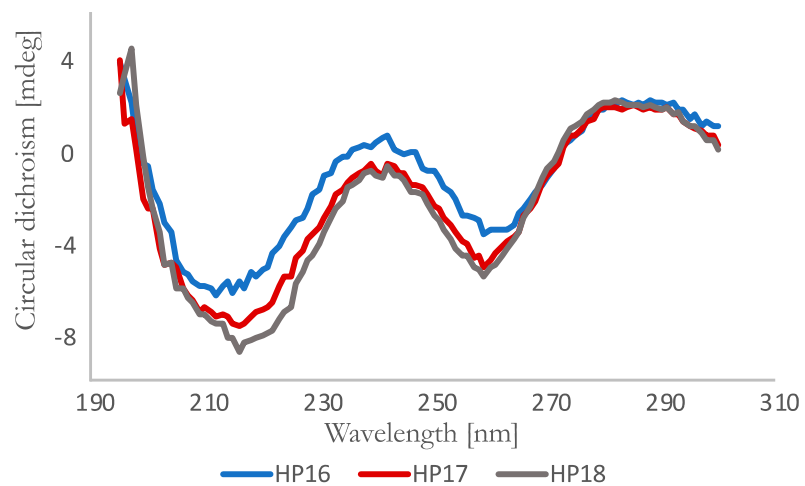

**Figure S10.** CD spectra of *HP15:HP16* (blue line), *HP15:HP17* (red line) and *HP15:HP18* (grey line).

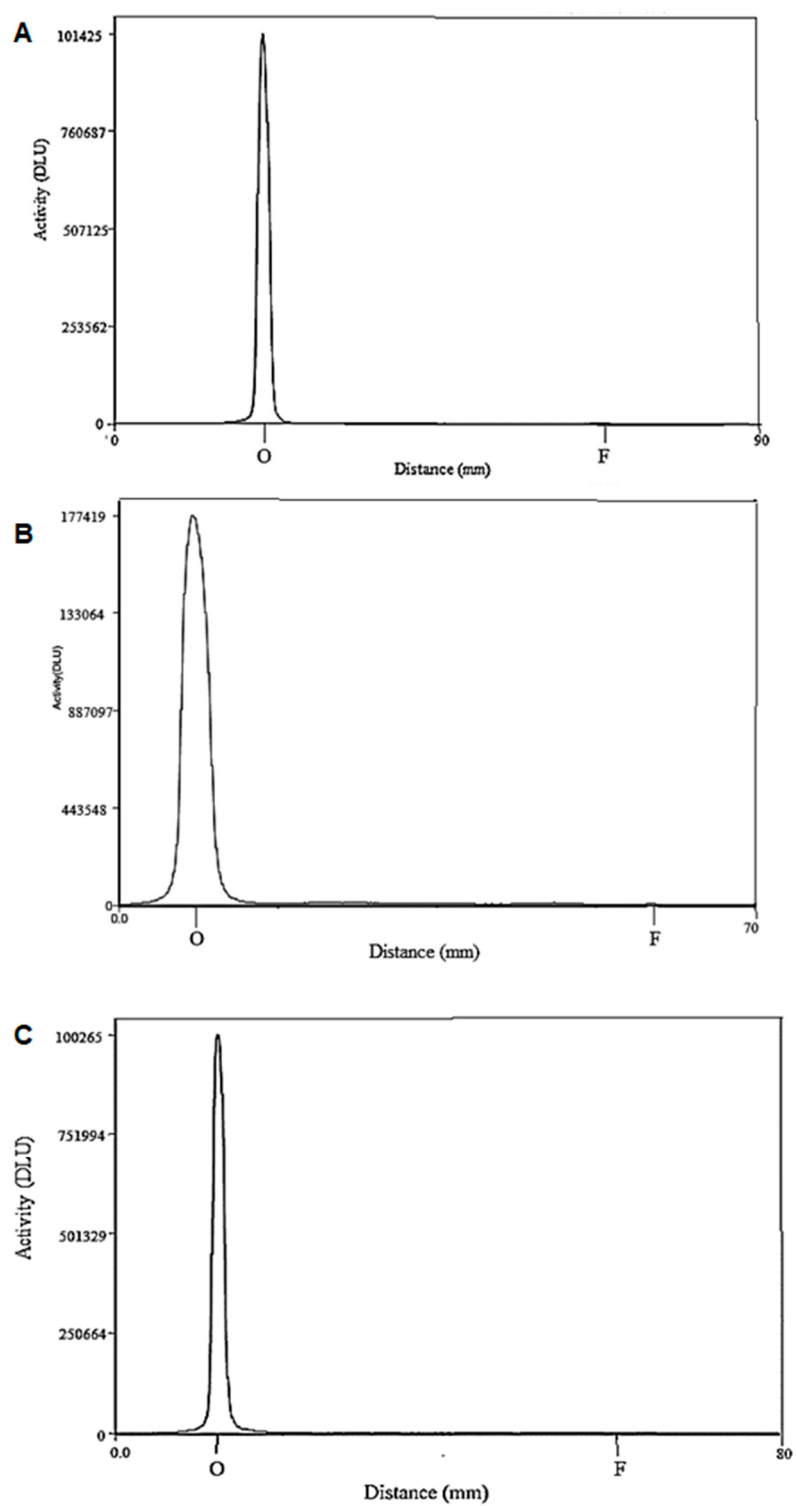

**Figure S11.** Distribution of radioactivity of (A)  $^{177}\text{Lu}$ -HP16, (B)  $^{177}\text{Lu}$ -HP17 and (C)  $^{177}\text{Lu}$ -HP18 along an ITLC strip. Retardation factor of labeled conjugate is 0.0 and that of free  $^{177}\text{Lu}$  is 1.0.

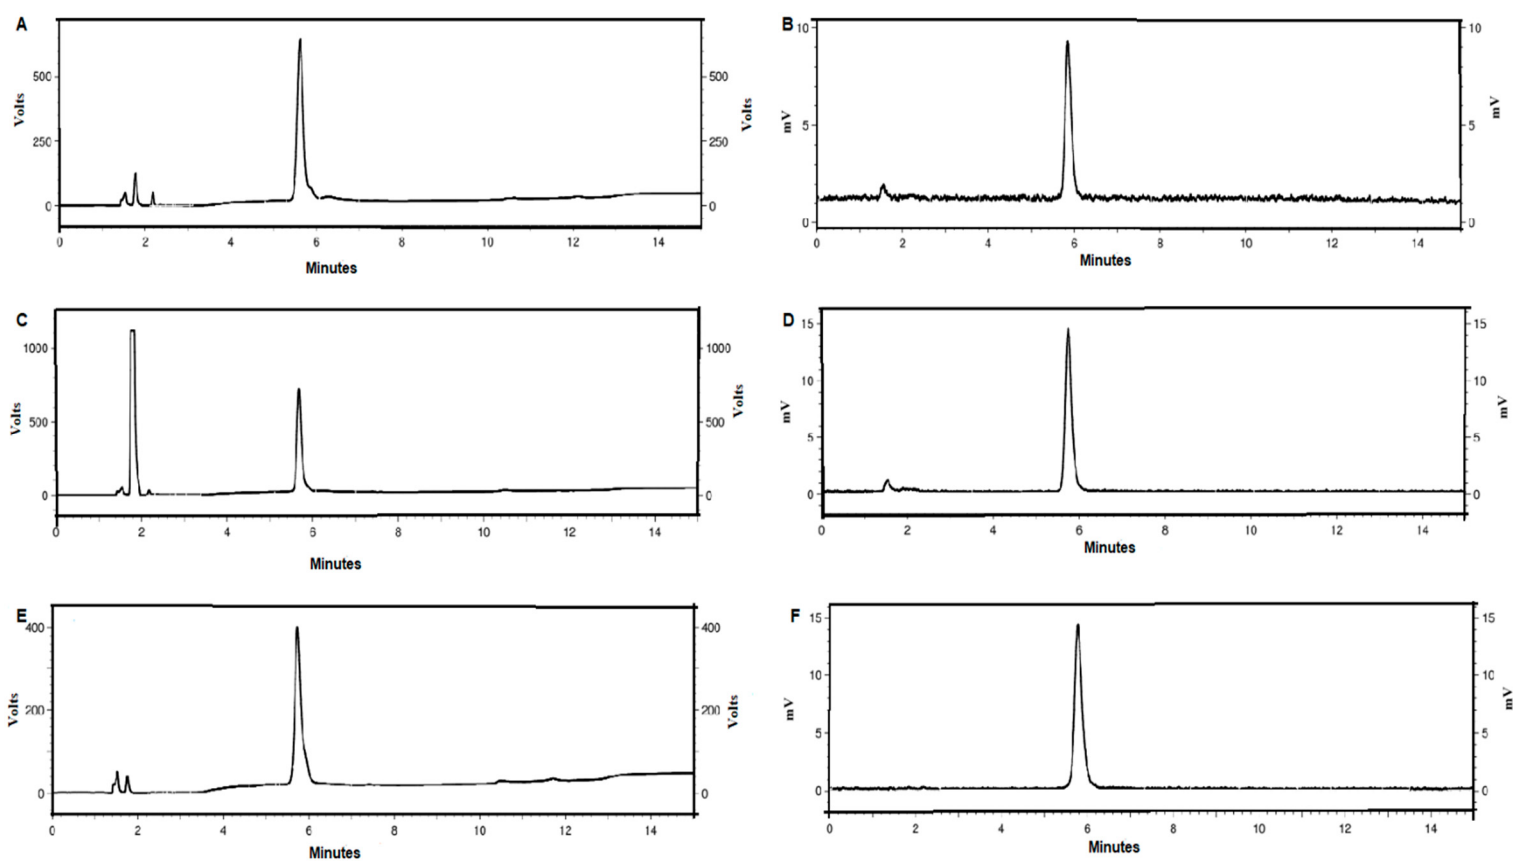

**Figure S12.** Characterization of secondary probes. Reversed-phase HPLC chromatograms of non-labeled (A) HP16, (C) HP17 and (E) HP18; and the radiochromatograms of (B) [ $^{177}\text{Lu}$ ]Lu-HP16, (D) [ $^{177}\text{Lu}$ ]Lu-HP17 and (F) [ $^{177}\text{Lu}$ ]Lu-HP18. The retention times (Rt) are expressed in minutes.

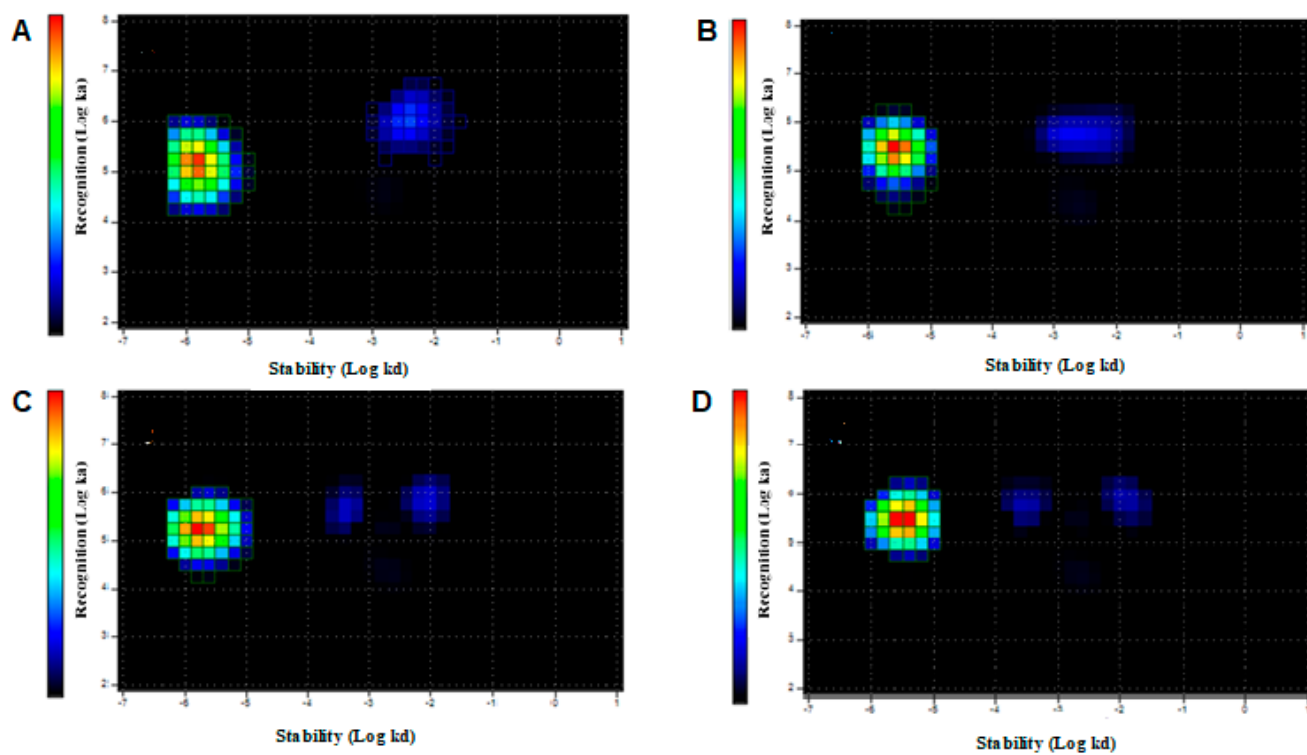

**Figure S13.** Interaction Map of (A) [ $^{177}\text{Lu}$ ]Lu-Z<sub>HER2:342</sub>-SR-HP15, (B) Z<sub>HER2:342</sub>-SR-HP15 + [ $^{177}\text{Lu}$ ]Lu-Z<sub>HER2:342</sub>-SR-HP16 (C) Z<sub>HER2:342</sub>-SR-HP15 + [ $^{177}\text{Lu}$ ]Lu-Z<sub>HER2:342</sub>-SR-HP17 and (D) Z<sub>HER2:342</sub>-SR-HP15 + [ $^{177}\text{Lu}$ ]Lu-Z<sub>HER2:342</sub>-SR-HP18 complexes binding to HER2-expressing SKOV3 cells. Binding was measured at two different concentrations: [ $^{177}\text{Lu}$ ]Lu-Z<sub>HER2:342</sub>-SR-HP15 (180, 540 pM), Z<sub>HER2:342</sub>-SR-HP15 (1 nM) and [ $^{177}\text{Lu}$ ]Lu-secondary probes (1, 5 nM).

**Table S1.** Apparent equilibrium dissociation ( $K_D$ ) constants for the interaction between [ $^{177}\text{Lu}$ ]-Lu-PNA probes and HER2-expressing SKOV3 cells determined using an Interaction Map analysis of the LigandTracer sensorgrams.

| Probe                                                         | $K_a$<br>(1/M×s) ×10 <sup>5</sup> | $K_d$<br>(1/s) ×10 <sup>-6</sup> | $K_D$ (pM) |
|---------------------------------------------------------------|-----------------------------------|----------------------------------|------------|
| [ $^{177}\text{Lu}$ ]Lu-Z <sub>HER2:342</sub> -SR-HP15        | 1.5 ± 0.3                         | 1.7 ± 0.0                        | 11.2 ± 1.9 |
| Z <sub>HER2:342</sub> -SR-HP15 + [ $^{177}\text{Lu}$ ]Lu-HP16 | 2.6 ± 0.4                         | 2.9 ± 0.2                        | 11.4±0.4   |
| Z <sub>HER2:342</sub> -SR-HP15 + [ $^{177}\text{Lu}$ ]Lu-HP17 | 1.7 ±0.0                          | 2.1 ±0.0                         | 12.1±0.2   |
| Z <sub>HER2:342</sub> -SR-HP15 + [ $^{177}\text{Lu}$ ]Lu-HP18 | 2.8 ± 0.3                         | 3.3 ± 0.1                        | 11.6±1.0   |

### Cellular processing and retention

Cells were seeded in cell-culture dishes with a density of 10<sup>6</sup> cells/dish for all experiments. A set of three dishes was used for each data point.

To study processing of the primary probe, cells were incubated with [ $^{177}\text{Lu}$ ]Lu-Z<sub>HER2:342</sub>-SR-HP15 (1 nM) for 1 h at 4 °C. The medium was removed, the cells were washed on ice, new medium was added and the cells were placed in a humidified incubator at 37 °C. At 1, 2, 4, 8 and 24 h, the medium was collected, cells were washed and treated with 0.2 M glycine buffer containing 4 M urea, pH 2.0, for 5 min on ice. The acidic solution was collected and cells were additionally washed with 1 mL glycine buffer. The cells were then incubated with 1 mL of 1 M NaOH at 37 °C for 10 min and collected with 1 mL of 1 M NaOH. The radioactivity in acidic fractions was considered as membrane-bound, and in the alkaline fractions as internalized.

For cellular processing and retention of [ $^{177}\text{Lu}$ ]Lu-secondary probes by SKOV3 and BT474, cells were incubated with Z<sub>HER2:342</sub>-SR-HP15 (1 nM) for 1 h at 4 °C, then the medium was removed, the cells were washed on ice with cold medium, [ $^{177}\text{Lu}$ ]Lu-secondary probe (10 nM in cold medium) was added, and the cells were incubated for 30 min at 4 °C. Then the medium was removed, the cells were washed on ice, new cold medium was added and the cells were placed in a humidified incubator at 37 °C. At 1, 2, 4, 8 and 24 h, a group of three dishes was removed from the incubator and treated as described above.

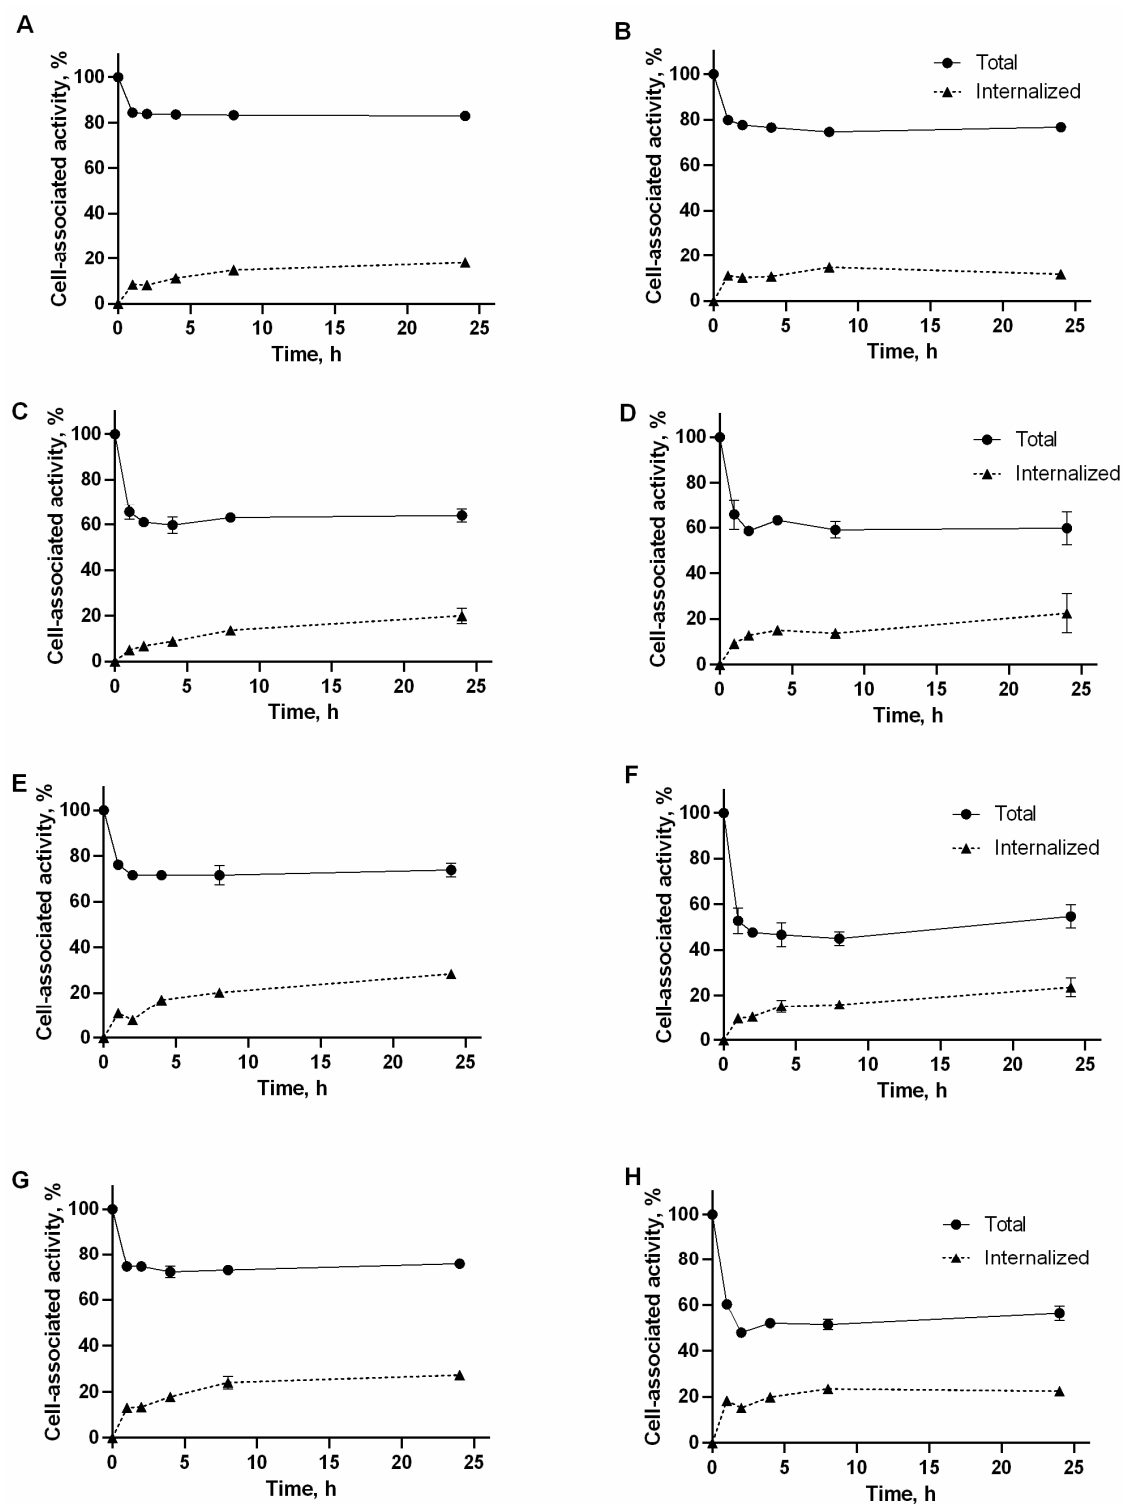

**Figure S14.** Cellular processing and retention of  $[^{177}\text{Lu}]$ Lu- $\text{Z}_{\text{HER2:342}}\text{-SR-HP15}$  (A,B),  $[^{177}\text{Lu}]$ Lu-HP16 (C,D),  $[^{177}\text{Lu}]$ Lu-HP17 (E,F) and  $[^{177}\text{Lu}]$ Lu-HP18 (G,H) by SKOV3 (A,C,E,G) and BT474 (B,D,F,H) cells after interrupted incubation with labeled compounds. In the case of labeled secondary probes, cells were pre-treated with non-labeled  $\text{Z}_{\text{HER2:342}}\text{-SR-HP15}$ . Thereafter, cells were incubated with the labeled compound at 4 °C to allow annealing with primary probes. After changing of medium, the cells were incubated at 37 °C. The data are presented as an average value from 3 samples  $\pm$  SD.

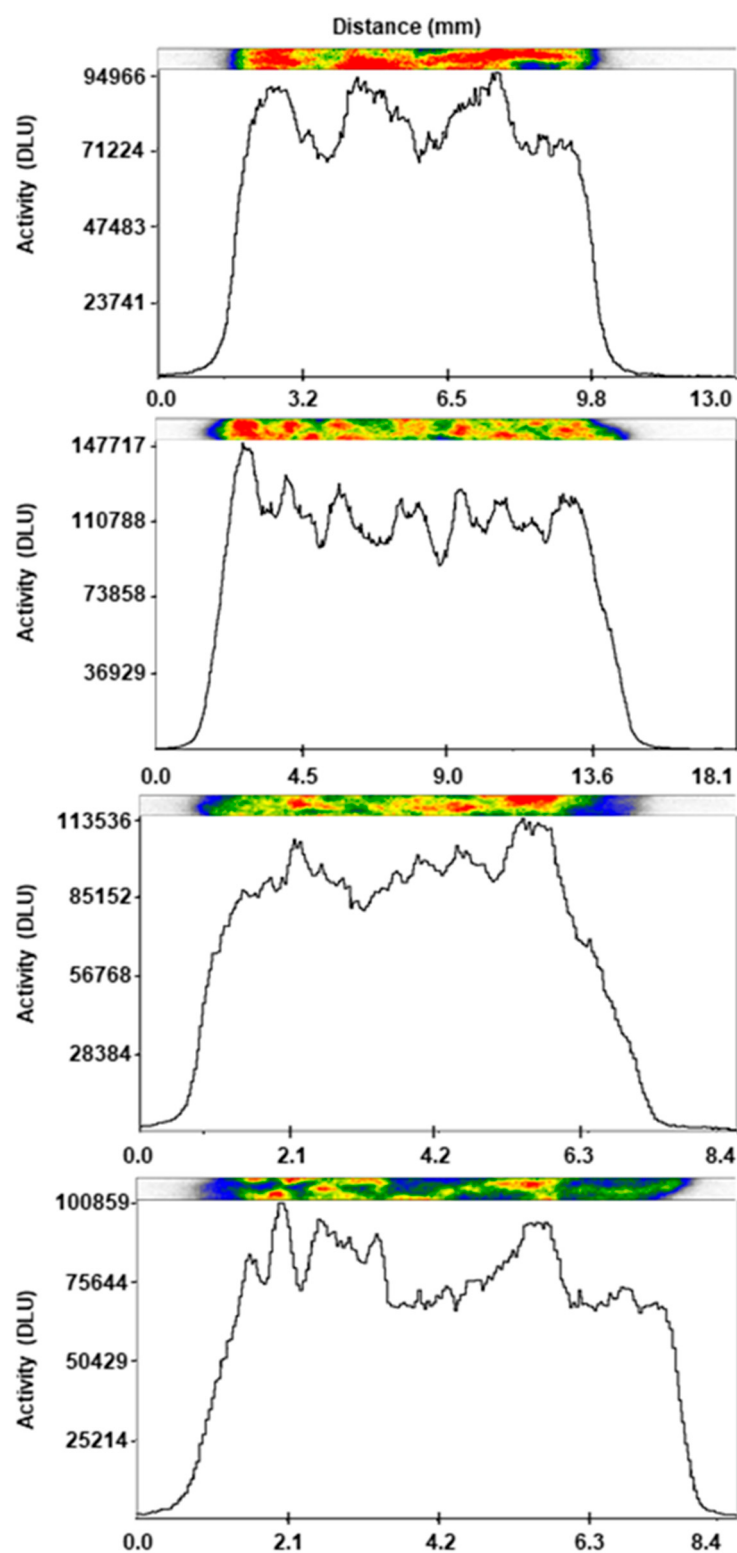

**Figure S15.** Ex vivo autoradiography of tumor slices of mice bearing HER2-expressing tumors from the pretargeting experiment. Mice were pre-injected with the primary agents, 16 h later they were injected with (A) [ $^{177}\text{Lu}$ ]Lu-HP16, (B) [ $^{177}\text{Lu}$ ]Lu-HP17, (C) [ $^{177}\text{Lu}$ ]Lu-HP18, (D) [ $^{177}\text{Lu}$ ]Lu-HP2 and were dissected 4 h pi.

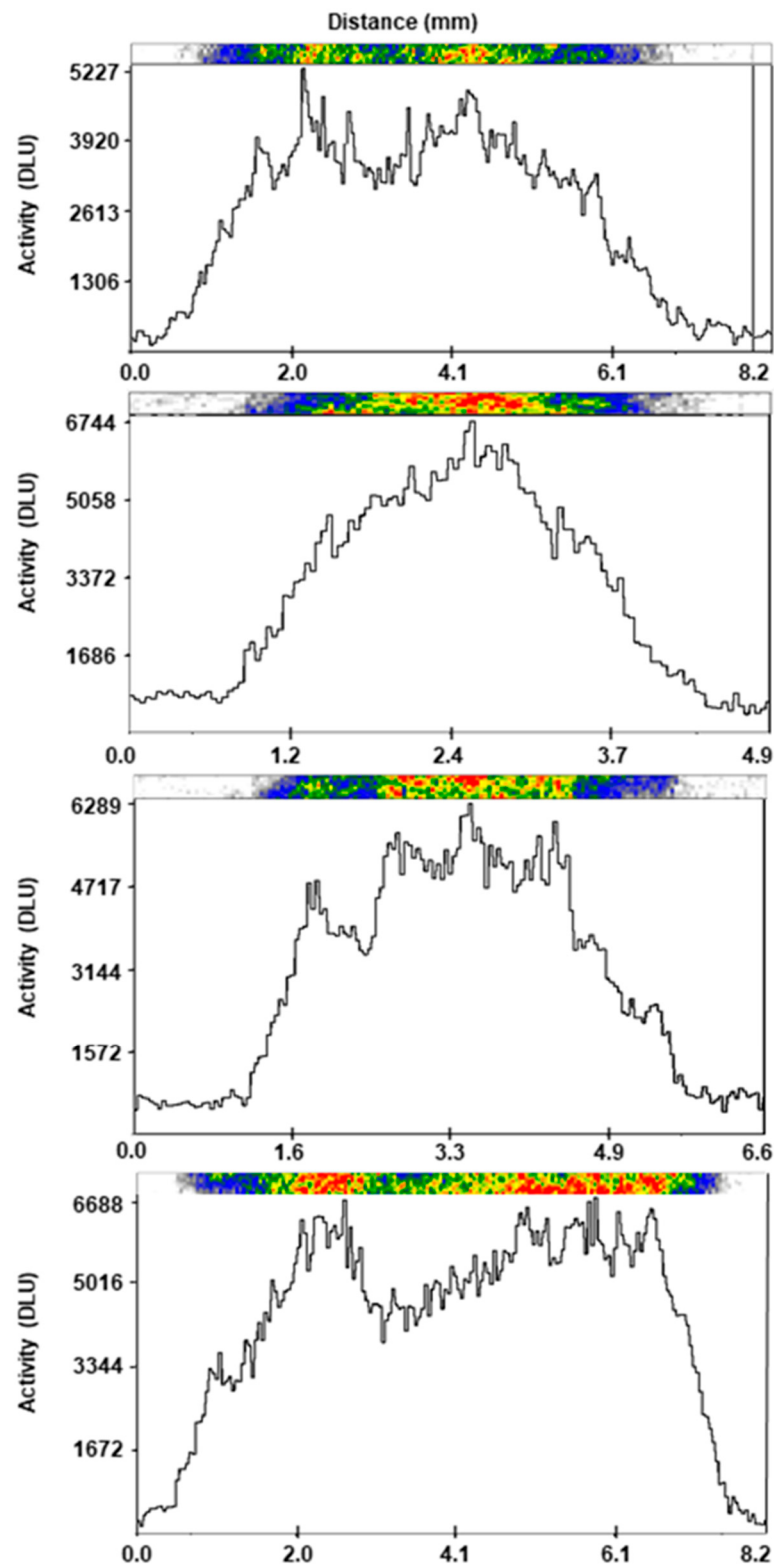

**Figure S16.** Ex vivo autoradiography of tumor slices of mice bearing HER2-expressing tumors from the pretargeting experiment. Mice were pre-injected with the primary agents, 16 h later they were injected with (A)  $[^{177}\text{Lu}]\text{Lu-HP16}$ , (B)  $[^{177}\text{Lu}]\text{Lu-HP17}$ , (C)  $[^{177}\text{Lu}]\text{Lu-HP18}$ , (D)  $[^{177}\text{Lu}]\text{Lu-HP2}$  and were dissected 144 h pi.

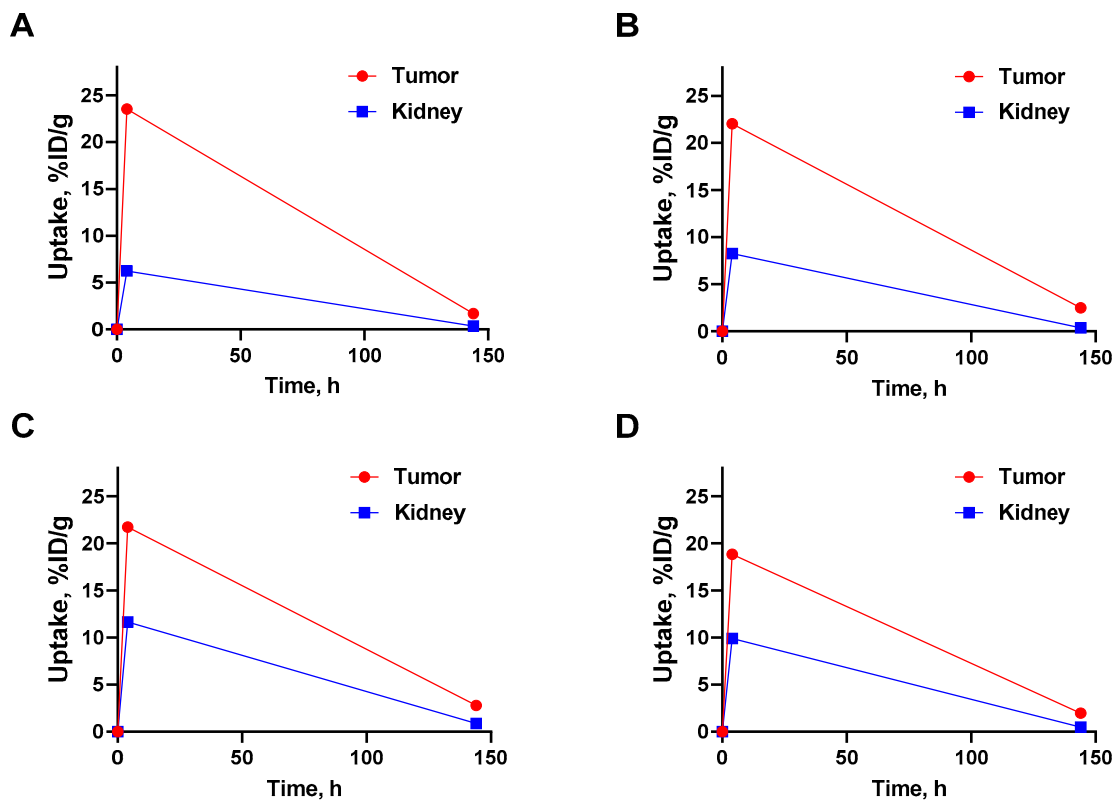

**Figure S17.** Time-activity plots for (A) [ $^{177}\text{Lu}$ ]Lu-HP16, (B) [ $^{177}\text{Lu}$ ]Lu-HP17, (C) [ $^{177}\text{Lu}$ ]Lu-HP18 and (D) [ $^{177}\text{Lu}$ ]Lu-HP2 . Non-decay corrected data for both kidney and tumor were used.

**Table S2.** Areas under time-activity plot.

|                                      | Area<br>for<br>kid-<br>neys | Area<br>for tu-<br>mor | Tumor-to-kidney ratio |
|--------------------------------------|-----------------------------|------------------------|-----------------------|
| [ $^{177}\text{Lu}$ ]<br>Lu-<br>HP16 | 460                         | 1780                   | 3.8                   |
| [ $^{177}\text{Lu}$ ]<br>Lu-<br>HP17 | 610                         | 1730                   | 2.8                   |
| [ $^{177}\text{Lu}$ ]<br>Lu-<br>HP18 | 890                         | 1730                   | 2.0                   |
| [ $^{177}\text{Lu}$ ]<br>Lu-<br>HP2  | 730                         | 1470                   | 2.0                   |
